# Supplementary material
Source: MDPI journal article supplement (https://www.mdpi.com/2077-0472/14/3/429)
Supplement: s1 [file s1]

## Supplementary material

**Table S1.** Equations for nitrogen budget model

| Entry  | Methodology                                                                                                                                                                                                                                                                                                                                                                                                                                                                                                                                                                                                                                                                                                             |
|--------|-------------------------------------------------------------------------------------------------------------------------------------------------------------------------------------------------------------------------------------------------------------------------------------------------------------------------------------------------------------------------------------------------------------------------------------------------------------------------------------------------------------------------------------------------------------------------------------------------------------------------------------------------------------------------------------------------------------------------|
| N1*    | $\sum_i [\text{Sale of the } i \text{ mineral fertilizer (ton/yr)} \times \text{N content of } i \text{ mineral fertilizer (\%)}]$                                                                                                                                                                                                                                                                                                                                                                                                                                                                                                                                                                                      |
| N2-1*  | $\sum_i [\text{Head of } i \text{ livestock (head)} \times \text{Unit of generation and discharge from } i \text{ livestock (L/head/d)} \times \text{Share from manure to manure treatment (\%)} \times \text{Coefficients of N conversion of } i \text{ livestock manure (\%)}]$                                                                                                                                                                                                                                                                                                                                                                                                                                       |
| N2-2*  | $\sum_i [\text{Head of } i \text{ livestock (head)} \times \text{Unit of generation and discharge from } i \text{ livestock (L/head/d)} \times \text{Share from manure to solid composting (\%)} \times \text{Coefficients of N conversion of } i \text{ livestock manure (\%)}]$                                                                                                                                                                                                                                                                                                                                                                                                                                       |
| N2-3*  | $\sum_i [\text{Head of } i \text{ livestock (head)} \times \text{Unit of generation and discharge from } i \text{ livestock (L/head/d)} \times \text{Share from manure to liquid composting (\%)} \times \text{Coefficients of N conversion of } i \text{ livestock manure (\%)}]$                                                                                                                                                                                                                                                                                                                                                                                                                                      |
| In put | $\sum_{ij} \{[\text{Amount of import } i \text{ solid composting from livestock manure (ton/yr)} \times \text{Coefficients of N conversion of } i \text{ solid composting (\%)}] + [\text{Amount of import } j \text{ liquid composting from livestock manure (ton/yr)} \times \text{Coefficients of N conversion of } j \text{ liquid composting (\%)}]\} - \sum_{kz} \{[\text{Amount of import } k \text{ solid composting from livestock manure (ton/yr)} \times \text{Coefficients of N conversion of } k \text{ solid composting (\%)}] + [\text{Amount of export } z \text{ liquid composting from livestock manure (ton/yr)} \times \text{Coefficients of N conversion of } z \text{ liquid composting (\%)}]\}$ |
| N3*    |                                                                                                                                                                                                                                                                                                                                                                                                                                                                                                                                                                                                                                                                                                                         |
| N4*    | $\sum_i [\text{Sale of the } i \text{ organic fertilizer (ton/yr)} \times \text{N content of } i \text{ organic fertilizer (\%)}]$                                                                                                                                                                                                                                                                                                                                                                                                                                                                                                                                                                                      |
| N5*    | $\sum_i [\text{Cropped area of } i \text{ legume (ha)} \times \text{Coefficients of N fixation of } i \text{ legume (kg/ha)}]$                                                                                                                                                                                                                                                                                                                                                                                                                                                                                                                                                                                          |
| N6*    | $\sum_i [\text{Area of paddy and upland (ha)} \times \text{Coefficients of N deposition (kg/ha)}]$                                                                                                                                                                                                                                                                                                                                                                                                                                                                                                                                                                                                                      |
| N7*    | $\sum_i [\text{Cropped area of } i \text{ seed (ha)} \times \text{Coefficients of N conversion of } i \text{ seed (kg/ha)}]$                                                                                                                                                                                                                                                                                                                                                                                                                                                                                                                                                                                            |

|             |      |                                                                                                                                                                                                                                                                                                                                                                                                                                                                                                                                                                                                                                                                                                                                                                                                                                                                                                                                                                                                                                                                                                                                                                                                                                                                                                                                                                                                                                                                                                                              |
|-------------|------|------------------------------------------------------------------------------------------------------------------------------------------------------------------------------------------------------------------------------------------------------------------------------------------------------------------------------------------------------------------------------------------------------------------------------------------------------------------------------------------------------------------------------------------------------------------------------------------------------------------------------------------------------------------------------------------------------------------------------------------------------------------------------------------------------------------------------------------------------------------------------------------------------------------------------------------------------------------------------------------------------------------------------------------------------------------------------------------------------------------------------------------------------------------------------------------------------------------------------------------------------------------------------------------------------------------------------------------------------------------------------------------------------------------------------------------------------------------------------------------------------------------------------|
|             | N8   | Total inputs Nitrogen = sum(N1, N2-1, N2-2, N2-3, N3, N4, N5, N6, N7)                                                                                                                                                                                                                                                                                                                                                                                                                                                                                                                                                                                                                                                                                                                                                                                                                                                                                                                                                                                                                                                                                                                                                                                                                                                                                                                                                                                                                                                        |
|             | N9*  | $\sum_i [\text{Cropped area of } i \text{ crop (ha)} \times \text{Coefficients of N conversion of } i \text{ crop (kg/ha)}]$                                                                                                                                                                                                                                                                                                                                                                                                                                                                                                                                                                                                                                                                                                                                                                                                                                                                                                                                                                                                                                                                                                                                                                                                                                                                                                                                                                                                 |
| Out<br>put  | N10* | $\sum_i [\text{Cropped area of } i \text{ fodder crop (ha)} \times \text{Coefficients of N conversion of } i \text{ fodder crop (kg/ha)}]$                                                                                                                                                                                                                                                                                                                                                                                                                                                                                                                                                                                                                                                                                                                                                                                                                                                                                                                                                                                                                                                                                                                                                                                                                                                                                                                                                                                   |
|             | N11  | Total outputs = sum(N9, N10)                                                                                                                                                                                                                                                                                                                                                                                                                                                                                                                                                                                                                                                                                                                                                                                                                                                                                                                                                                                                                                                                                                                                                                                                                                                                                                                                                                                                                                                                                                 |
|             | NS   | Surplus (NS) = N9 – N11                                                                                                                                                                                                                                                                                                                                                                                                                                                                                                                                                                                                                                                                                                                                                                                                                                                                                                                                                                                                                                                                                                                                                                                                                                                                                                                                                                                                                                                                                                      |
|             |      | $\sum_{jkz} \{ [\text{Amount of N loss at } j \text{ livestock manure treatment plant (LMTP) (ton/yr)}] + [\text{Amount of N loss during composting at } k \text{ solid composting facility (SCF) (ton/yr)}] + [\text{Amount of N loss during composting at } z \text{ liquid composting facility (LCF) (ton/yr)}] \}$ <p>○ Amount of N loss at j LMTP (j= Public, Individual, Communal)</p> $= \sum_{ij} [\text{Head of } i \text{ livestock (head)} \times \text{Unit of generation and discharge from } i \text{ livestock (L/head/d)} \times \text{Share from manure to manure treatment at } j \text{ LMTP (\%)} - [\text{Amount of input at } j \text{ LMTP (m}^3/\text{d)} \times \text{N concentration of treated manure at } j \text{ LMTP (mg/L)}]]$ <p>○ Amount of N loss at k SCF (k= Recycling business, Individual, Communal)</p> $= \sum_{ik} \{ [\text{Head of } i \text{ livestock (head)} \times \text{Unit of generation and discharge from } i \text{ livestock (L/head/d)} \times \text{Share from manure to solid composting at } k \text{ SCF (\%)} + [\text{Quantity of sawdust bedding in } k \text{ SCF (kg/head/d)}]] \times [\text{Coefficients of N conversion of } i \text{ solid composting at } k \text{ SCF (\%)}] \}$ <p>○ Amount of N loss at z LCF (z= Recycling business, Individual, Communal)</p> $= \sum_z [\text{Amount of evaporation during composting at } z \text{ LCF (m}^3/\text{d)} \times \text{Coefficients of N conversion of liquid composting at } z \text{ LCF (\%)}]$ |
| Sur<br>plus | aNS* |                                                                                                                                                                                                                                                                                                                                                                                                                                                                                                                                                                                                                                                                                                                                                                                                                                                                                                                                                                                                                                                                                                                                                                                                                                                                                                                                                                                                                                                                                                                              |
|             | hNS  | hydrospheric Nitrogen Surplus(hNS) = NS - aNS                                                                                                                                                                                                                                                                                                                                                                                                                                                                                                                                                                                                                                                                                                                                                                                                                                                                                                                                                                                                                                                                                                                                                                                                                                                                                                                                                                                                                                                                                |

\* N1: Amount of nitrogen of mineral fertilizers, N2-1: Amount of nitrogen from manure to livestock manure treatment, N2-2: Amount of nitrogen from to manure to solid composting, N2-3: Amount of

---

nitrogen from to manure to liquid composting, N3: Amount of nitrogen of solid and liquid composting import/export, N4: Amount of nitrogen of other organic fertilizer, N5: Amount of nitrogen of biological nitrogen fixation, N6: Amount of nitrogen of atmospheric nitrogen deposition, N7: Amount of nitrogen of seed and planting material, N9: Amount of nitrogen of crop production, N10: Amount of nitrogen of fodder production, aNS: Amount of nitrogen of atmospheric nitrogen surplus

---

**Table S2.** Parameters for calculating the nitrogen budget model

| Index                           | Parameter                                                   | Unit                 | Coefficient            |                            | References        |          |
|---------------------------------|-------------------------------------------------------------|----------------------|------------------------|----------------------------|-------------------|----------|
| Manure                          | Livestock excreta unit in South Korea                       | L/head/d             | Solid                  | Min.                       | 0.09              | [74]     |
|                                 |                                                             |                      |                        | Max.                       | 19.2              |          |
|                                 |                                                             |                      | Slurry                 | Min.                       | 1.7               |          |
|                                 |                                                             |                      |                        | Max.                       | 10.9              |          |
|                                 | Nutrient excretion coefficients of livestock in South Korea | %                    | N                      | Min.                       | 0.3               |          |
|                                 |                                                             |                      |                        | Max.                       | 1.4               |          |
| Manure fertilizers              | Nutrient content of manure fertilizers                      | %                    | Solid                  | N                          | 1.7               |          |
|                                 |                                                             |                      | Slurry                 | N                          | 0.3               |          |
| Biological nitrogen fixation    | Annual rates of biological nitrogen fixation                | kg/ha/yr             | Soya bean (average)    |                            | 20–135 (77.5)     | [75]     |
|                                 |                                                             |                      | Adzuki beans (average) |                            | 24–125 (74.5)     |          |
| Atmospheric nitrogen deposition | Coefficients of atmospheric nitrogen deposition             | g/m <sup>2</sup> /yr | 2005–2014 (average)    |                            | 1.29–3.31 (2.41*) | [76, 77] |
| Seed and planting material      | Annual nitrogen coefficients of seed input                  | kg/ha/yr             | N                      |                            | 0.4–8.6 (3.9)     | [75]     |
| Crop production                 | Fertilizer recommendation guidelines for crops              | kg/10 a              | N                      | Min.                       | 0.0               | [78]     |
|                                 |                                                             |                      |                        | Max.                       | 60.0              |          |
| Fodder production               |                                                             |                      |                        | Pasture grass/ Forage corn | N                 |          |
| Livestock manure                | Effluent water quality                                      | mg/L                 | N                      | Individual                 | 250.0             | [79]     |
|                                 |                                                             |                      |                        | Communal                   | 60.0              |          |

|                                                   |                                                                                  |                      |                      |                             |                     |
|---------------------------------------------------|----------------------------------------------------------------------------------|----------------------|----------------------|-----------------------------|---------------------|
| treatment plant<br>(LMTP)                         |                                                                                  |                      |                      |                             |                     |
| Solid<br>composting<br>from livestock<br>excreta  | Weight loss<br>percentages of<br>livestock excreta<br>during solid<br>composting | %                    |                      | Beef                        | 42.3–98.0<br>(78.5) |
|                                                   |                                                                                  |                      |                      | Dairy cow                   | 46.0–80.0<br>(61.5) |
|                                                   |                                                                                  |                      |                      | Swine                       | 27.0–69.0<br>(66.3) |
|                                                   |                                                                                  |                      |                      | Layer                       | 64.0–78.0<br>(65.5) |
|                                                   |                                                                                  |                      |                      | Broiler and duck            | 86.0                |
|                                                   | Nutrient<br>coefficients of<br>livestock excreta<br>during solid<br>composting   | %                    | N                    | Min.                        | 0.4                 |
|                                                   |                                                                                  |                      |                      | Max.                        | 1.6                 |
|                                                   |                                                                                  |                      |                      |                             |                     |
| Liquid<br>composting<br>from livestock<br>excreta | Amount of<br>evaporation<br>during liquid<br>composting in<br>South Korea        | m <sup>3</sup> /d    |                      | 0.4                         | [85]                |
| Nitrogen<br>emission                              | Ammonia<br>emission during<br>application of<br>fertilizers in<br>cropland       | kg NH <sub>3</sub> / | Mineral              | Urea                        | 141.5               |
|                                                   |                                                                                  | tn N                 | fertilizer           | Complex                     | 75.2                |
|                                                   |                                                                                  | %                    | Manure<br>fertilizer | NH <sub>3</sub><br>contents | 3.0                 |
|                                                   |                                                                                  |                      |                      | Loss of<br>NH <sub>3</sub>  | 66.0                |

**Table S3.** Data and investigating organizations for nitrogen budget components

| Entry                                      | Category                | Data                                                             | Sources                                                   |
|--------------------------------------------|-------------------------|------------------------------------------------------------------|-----------------------------------------------------------|
| Livestock<br>manure<br>composting<br>input | N 1                     | Sale of mineral fertilizer                                       | Korean Statistical<br>Information Service<br>(KOSIS)      |
|                                            | N 2                     | Livestock head and manure to solid and<br>liquid composting rate | Water Emission<br>Management System<br>(WEMS)             |
|                                            | N 4                     | Sale of other organic fertilizers                                | National Agricultural<br>Cooperative<br>Federation (NACF) |
|                                            | N 6                     | Cultivated area of leguminous crops                              |                                                           |
|                                            | N 7, 9, and 10<br>(N 5) | Area of paddy and upland                                         | Agricultural<br>Integrated                                |
|                                            |                         | Cropped area of seeds                                            | Information Excellent<br>System                           |
| Cultivated area of crops                   |                         | (AGRIX)                                                          |                                                           |
| Output                                     |                         | Cultivated area of fodder crops                                  |                                                           |
